# Supplementary material for: A simple fluorescent probe for biothiols detection and imaging of living cells in vivo based on a hemicyanine derivative
Source: Research Square preprint supplement (doi:10.21203/rs.3.rs-6233684/v1), 2025-04-01
Supplement: Supplementary file 1 [file 81d7145163caa09327e107e7.docx]

Supplementary Information

**A simple fluorescent probe for biothiols detection and imaging of living cells in vivo based on a hemicyanine derivative**

Xia Gao1* ·Xuehan Liu1· Xinping Zheng1·Yaxin Liu1·Jinming Lin1·Pengbo Zhang1*

1School of Public Health, Xinxiang Medical University, Xinxiang 453003, PR China，Corresponding authors, E-mail: 071009@xxmu.edu.cn (Xia Gao); zpbxxmu@xxmu.edu.cn (Pengbo Zhang)

Fig.S1 1H NMR spectroscopy of compound 1

Fig.S2 13C NMR spectroscopy of compound 1

Fig.S3 1H NMR spectroscopy of the probe HCD

Fig.S4 13C NMR spectroscopy of the probe HCD (DMSO)

Fig.S5 MS spectroscopy of the probe HCD


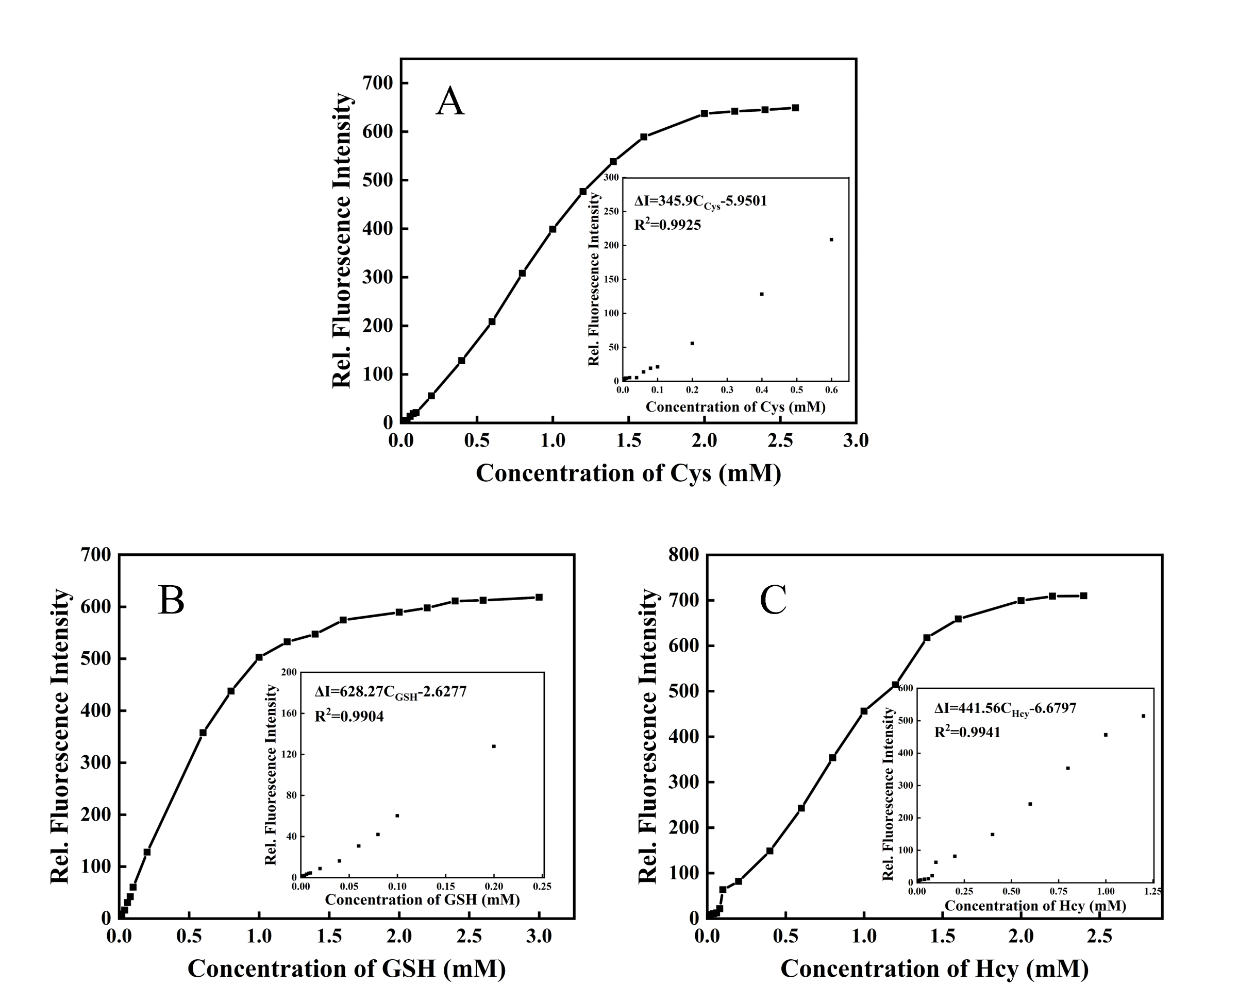


**Fig.S6The fluorescence titration curves and calibration graphs for spectrophotometric determination of Cys(A),GSH(B)and Hcy(C) in the simulated physiological media.**([HCD] = 2.00×10-5 M，[HCO3-]= 1.00×10-3 M，[HPO42-]= 2.00×10-1 M，[H2PO4-]= 2.00×10-1 M，[Na+]= 1.00×10-3 M，[K+]= 1.00×10-3 M，[Ca2+]= 5.00×10-4 M，[Mg2+]= 5.00×10-4 M，[Cl-]= 2.00 ×10-3 M，pH=7.40 PB buffer, response at 37°C for 40 min)


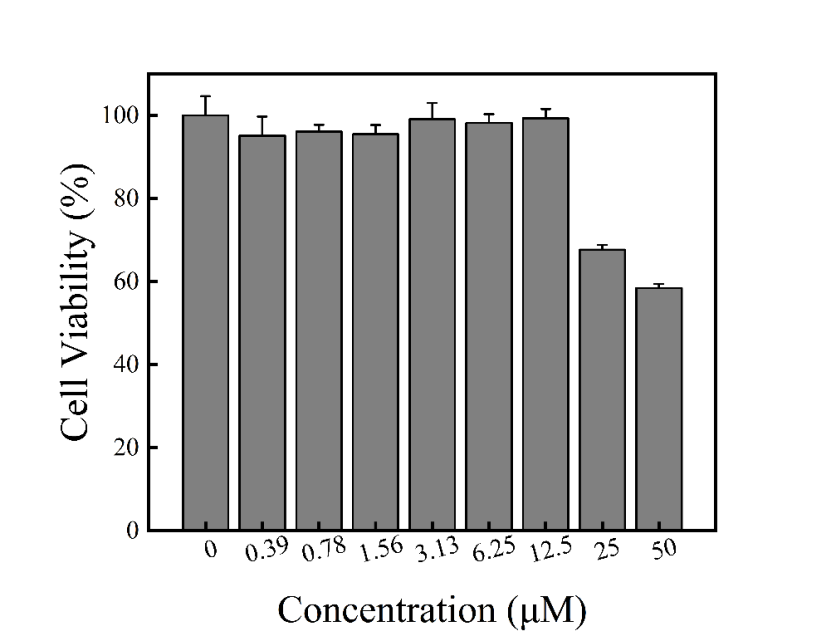


Fig.S7 Results of the toxicity of HCD to RAW264.7 cells determined by CCK-8 method

Fig.S8 MS spectroscopy of HCD-Cys
